# Supplementary material for: Serotonergic treatment normalizes midbrain dopaminergic neuron increase after periaqueductal gray stimulation-induced anticipatory fear in a rat model
Source: bioRxiv or medRxiv preprint supplement (doi:10.1101/714592), 2019-07-25
Supplement: Supplementary file [file media-1.pdf]

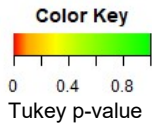

|       |         |       |       |       |       |                      |
|-------|---------|-------|-------|-------|-------|----------------------|
| 0     | 1       | 0.988 | 0.928 | 1     | 0.999 | Sham:Sal-DBS:Busp    |
| 0.004 | 0.848   | 1     | 0.998 | 0.956 | 0.947 | DBS:Escit-Sham:Busp  |
| 0.217 | 0.99    | 0.913 | 0.986 | 0.996 | 0.87  | Sham:Sal-Sham:Busp   |
| 0.6   | 0.996   | 0.969 | 1     | 0.999 | 1     | Sham:Sal-DBS:Escit   |
| 0     | 0.985   | 0.677 | 0.793 | 0.989 | 1     | DBS:Escit-DBS:Busp   |
| 0.019 | 0.993   | 0.559 | 0.591 | 1     | 0.958 | Sham:Busp-DBS:Busp   |
| 0.567 | 0.982   | 0.338 | 0.923 | 0.515 | 0.046 | Sham:Sal-Sham:Escit  |
| 0.021 | 0.795   | 0.741 | 0.972 | 0.698 | 0.067 | Sham:Escit-DBS:Escit |
| 0.002 | 0.987   | 0.086 | 0.356 | 0.345 | 0.075 | Sham:Escit-DBS:Busp  |
| 0     | 0.007   | 0.002 | 0.74  | 0.061 | 0.891 | Sham:Sal-DBS:Sal     |
| 0     | 0.016   | 0     | 0.544 | 0.02  | 0.732 | DBS:Sal-DBS:Escit    |
| 0.03  | 0.001   | 0     | 0.366 | 0.217 | 0.297 | DBS:Sal-Sham:Busp    |
| 0.003 | 0       | 0     | 0.194 | 0.001 | 0.003 | DBS:Sal-Sham:Escit   |
| 0.975 | 1       | 0.907 | 1     | 0.288 | 0.474 | Sham:Escit-Sham:Busp |
| 1     | 0.002   | 0.006 | 0.996 | 0.079 | 0.702 | DBS:Sal-DBS:Busp     |
| Acute | Chronic | VTA   | SNpc  | DRN   | MnR   |                      |

**Supplementary Figure 1. Heat plot of p-values from Tukey's test.** Numbers in the table are p-values from Tukey's post-hoc tests from the ANOVAs. The heatmap shows the levels of significance (red represents more significance and green represents less significance).
